# Supplementary material for: Impact of containment design on nuclear plant availability
Source: MDPI journal article supplement (doi:10.3390/molecules28030942), 1976-01-01

# $\sigma$ -Aromatic $\text{MAl}_6\text{S}_6$ (M = Ni, Pd, Pt) Stars Containing Planar Hexacoordinate Transition Metals

Li-Xia Bai and Jin-Chang Guo \*

Nanocluster Laboratory, Institute of Molecular Science, Shanxi University, Taiyuan 030006, China; bailixia2021@163.com

\* Correspondence: guojc@sxu.edu.cn

**Table S1.** Cartesian coordinates for global-minimum (GM) clusters **1–3** of the  $\text{MAl}_6\text{S}_6$  (M = Ni, Pd, Pt) series at the PBE0/def2-TZVP level, along with four lowest-lying ***nB–nE*** isomeric structures.

**Table S2.** Orbital composition analysis for the canonical molecular orbitals (CMOs) of GM  $\text{NiAl}_6\text{S}_6$  (**1**,  $D_{6h}$ ,  $^1A_{1g}$ ) cluster. Main components greater than 15% are shown in bold.

**Table S3.** Orbital composition analysis for the lowest unoccupied molecular orbitals (LUMOs) of the  $\text{MAl}_6\text{S}_6$  (M = Ni, Pd, Pt) series.

**Figure S1.** The AdNDP bonding pattern of  $\text{PdAl}_6\text{S}_6$ . Occupation numbers (ONs) are shown.

**Figure S2.** The AdNDP bonding pattern of  $\text{PtAl}_6\text{S}_6$ . Occupation numbers (ONs) are shown.

**Figure S3.** Nucleus independent chemical shifts (NICSs) for clusters **1–3**. Here the NICS(0) data (blue color) are calculated at the center of the Al-M-Al (M = Ni, Pd, Pt) triangle, whereas the NICS(1) values (red color) are at 1 Å above the center of the Al-S-Al triangle.

**Figure S4.** Calculated IR spectrums of  $\text{PdAl}_6\text{S}_6$  and  $\text{PtAl}_6\text{S}_6$  at the PBE0/def2-TZVP level.

**Table S1.** Cartesian coordinates for global-minimum (GM) clusters **1–3** of the  $\text{MAl}_6\text{S}_6$  ( $\text{M} = \text{Ni, Pd, Pt}$ ) series at the PBE0/def2-TZVP level, along with four lowest-lying  $n\text{B}–n\text{E}$  isomeric structures.

| <b>1 NiAl<sub>6</sub>S<sub>6</sub> (<i>D</i><sub>6h</sub>, <sup>1</sup>A<sub>1g</sub>)</b> |             |             |             | <b>1B NiAl<sub>6</sub>S<sub>6</sub> (<i>C</i><sub>s</sub>, <sup>1</sup>A')</b>             |             |             |             |
|--------------------------------------------------------------------------------------------|-------------|-------------|-------------|--------------------------------------------------------------------------------------------|-------------|-------------|-------------|
| Ni                                                                                         | 0.00000000  | 0.00000000  | 0.00000000  | Ni                                                                                         | 0.67460200  | 0.19444800  | 0.00000000  |
| Al                                                                                         | 0.00000000  | 2.53498700  | 0.00000000  | Al                                                                                         | −0.92387700 | 1.95041800  | 0.00000000  |
| Al                                                                                         | −2.19536300 | 1.26749400  | 0.00000000  | Al                                                                                         | 0.19351400  | −1.83175300 | 1.38505000  |
| Al                                                                                         | 2.19536300  | 1.26749300  | 0.00000000  | Al                                                                                         | 0.19351400  | −1.83175300 | −1.38505000 |
| Al                                                                                         | 2.19536300  | −1.26749400 | 0.00000000  | Al                                                                                         | 2.17457400  | 1.74292300  | 0.00000000  |
| Al                                                                                         | 0.00000000  | −2.53498700 | 0.00000000  | Al                                                                                         | −0.08436800 | 0.74303800  | −2.18111900 |
| Al                                                                                         | −2.19536300 | −1.26749300 | 0.00000000  | Al                                                                                         | −0.08436800 | 0.74303800  | 2.18111900  |
| S                                                                                          | −1.98667600 | 3.44102400  | 0.00000000  | S                                                                                          | −0.08436800 | −1.07057000 | −3.43346600 |
| S                                                                                          | 1.98667600  | 3.44102400  | 0.00000000  | S                                                                                          | −1.45421900 | 2.48469800  | −2.06270100 |
| S                                                                                          | 3.97335200  | 0.00000000  | 0.00000000  | S                                                                                          | −1.27640800 | −2.71849400 | 0.00000000  |
| S                                                                                          | 1.98667600  | −3.44102400 | 0.00000000  | S                                                                                          | −0.08436800 | −1.07057000 | 3.43346600  |
| S                                                                                          | −1.98667600 | −3.44102400 | 0.00000000  | S                                                                                          | 1.97947600  | −1.68172500 | 0.00000000  |
| S                                                                                          | −3.97335200 | 0.00000000  | 0.00000000  | S                                                                                          | −1.45421900 | 2.48469800  | 2.06270100  |
| <b>1C NiAl<sub>6</sub>S<sub>6</sub> (<i>C</i><sub>s</sub>, <sup>1</sup>A')</b>             |             |             |             | <b>1D NiAl<sub>6</sub>S<sub>6</sub> (<i>C</i><sub>1</sub>, <sup>1</sup>A)</b>              |             |             |             |
| Ni                                                                                         | 0.89493600  | 0.18857400  | 0.00000000  | Ni                                                                                         | −0.00994900 | −0.10477900 | −1.05421000 |
| Al                                                                                         | −1.69017400 | −0.25659500 | 0.00000000  | Al                                                                                         | 0.14649000  | 0.49894800  | 1.53118700  |
| Al                                                                                         | −0.52794500 | 0.71487400  | 2.11094400  | Al                                                                                         | 2.34013800  | 0.08478700  | 0.46138700  |
| Al                                                                                         | 0.36169200  | −1.72833600 | −1.40043700 | Al                                                                                         | −1.96328800 | −0.99705000 | −0.02846100 |
| Al                                                                                         | 0.36169200  | −1.72833600 | 1.40043700  | Al                                                                                         | 0.55646900  | −2.00192000 | 0.28476100  |
| Al                                                                                         | −0.52794500 | 0.71487400  | −2.11094400 | Al                                                                                         | −1.62404900 | 1.64300600  | −0.62907800 |
| Al                                                                                         | −0.21701600 | 2.30513000  | 0.00000000  | Al                                                                                         | 0.78533700  | 2.07657300  | −0.68678300 |
| S                                                                                          | −1.19350700 | −2.64301300 | 0.00000000  | S                                                                                          | −0.58216500 | 2.61788400  | 1.23284000  |
| S                                                                                          | 2.12988900  | −1.73767000 | 0.00000000  | S                                                                                          | −0.99288300 | −1.49985400 | 1.98127500  |
| S                                                                                          | 0.18656100  | −0.92324400 | −3.43384400 | S                                                                                          | −0.81414100 | −2.29792500 | −1.45734700 |
| S                                                                                          | 0.18656100  | −0.92324400 | 3.43384400  | S                                                                                          | −3.50877700 | 0.51089500  | −0.29614800 |
| S                                                                                          | −0.52794500 | 2.93980400  | 2.07949800  | S                                                                                          | 2.73827700  | −2.10026200 | 0.28873600  |
| S                                                                                          | −0.52794500 | 2.93980400  | −2.07949800 | S                                                                                          | 2.98120600  | 1.89284700  | −0.66256200 |
| <b>1E NiAl<sub>6</sub>S<sub>6</sub> (<i>C</i><sub>s</sub>, <sup>1</sup>A')</b>             |             |             |             | <b>2 PdAl<sub>6</sub>S<sub>6</sub> (<i>D</i><sub>6h</sub>, <sup>1</sup>A<sub>1g</sub>)</b> |             |             |             |
| Ni                                                                                         | −0.92651300 | −0.24786300 | 0.00000000  | Pd                                                                                         | 0.00000000  | 0.00000000  | 0.00000000  |
| Al                                                                                         | 0.08428900  | −2.07002200 | 1.23503700  | Al                                                                                         | 0.00000000  | 2.58196200  | 0.00000000  |
| Al                                                                                         | −0.09184000 | 0.46054300  | 2.10353400  | Al                                                                                         | 2.23604500  | 1.29098100  | 0.00000000  |
| Al                                                                                         | 0.45194600  | 2.16173400  | 0.00000000  | Al                                                                                         | −2.23604500 | 1.29098100  | 0.00000000  |
| Al                                                                                         | 1.67946500  | 0.03531900  | 0.00000000  | Al                                                                                         | −2.23604500 | −1.29098100 | 0.00000000  |
| Al                                                                                         | 0.08428900  | −2.07002200 | −1.23503700 | Al                                                                                         | 0.00000000  | −2.58196200 | 0.00000000  |

|                                                                                     |             |             |             |                                                                         |             |             |             |
|-------------------------------------------------------------------------------------|-------------|-------------|-------------|-------------------------------------------------------------------------|-------------|-------------|-------------|
| Al                                                                                  | -0.09184000 | 0.46054300  | -2.10353400 | Al                                                                      | 2.23604500  | -1.29098100 | 0.00000000  |
| S                                                                                   | -1.68829300 | -1.09728900 | -2.20871600 | S                                                                       | 2.00134900  | 3.46643800  | 0.00000000  |
| S                                                                                   | -0.22309800 | 2.64641500  | 2.06595000  | S                                                                       | -2.00134900 | 3.46643800  | 0.00000000  |
| S                                                                                   | 1.86233900  | -0.91709700 | 2.11807400  | S                                                                       | -4.00269800 | 0.00000000  | 0.00000000  |
| S                                                                                   | -1.68829300 | -1.09728900 | 2.20871600  | S                                                                       | -2.00134900 | -3.46643800 | 0.00000000  |
| S                                                                                   | 1.86233900  | -0.91709700 | -2.11807400 | S                                                                       | 2.00134900  | -3.46643800 | 0.00000000  |
| S                                                                                   | -0.22309800 | 2.64641500  | -2.06595000 | S                                                                       | 4.00269800  | 0.00000000  | 0.00000000  |
| <b>2B PdAl<sub>6</sub>S<sub>6</sub> (C<sub>s</sub>, <sup>1</sup>A')</b>             |             |             |             | <b>2C PdAl<sub>6</sub>S<sub>6</sub> (C<sub>1</sub>, <sup>1</sup>A)</b>  |             |             |             |
| Pd                                                                                  | 0.94425900  | 0.29292700  | 0.00000000  | Pd                                                                      | -0.03358200 | 0.10282800  | -1.08965500 |
| Al                                                                                  | -1.89134100 | -0.33946000 | 0.00000000  | Al                                                                      | -0.31475700 | -0.52137200 | 1.73044500  |
| Al                                                                                  | -0.77327300 | 0.64643800  | 2.08625900  | Al                                                                      | -2.30136900 | 0.28775900  | 0.50066100  |
| Al                                                                                  | 0.40467500  | -1.75743300 | -1.37851000 | Al                                                                      | 2.11229200  | 0.65629500  | 0.08203800  |
| Al                                                                                  | 0.40467500  | -1.75743300 | 1.37851000  | Al                                                                      | -0.14796000 | 2.09015400  | 0.41540200  |
| Al                                                                                  | -0.77327300 | 0.64643800  | -2.08625900 | Al                                                                      | 1.30484100  | -1.96252700 | -0.57971600 |
| Al                                                                                  | -0.42487200 | 2.32881200  | 0.00000000  | Al                                                                      | -1.16240600 | -2.00996500 | -0.61155100 |
| S                                                                                   | -1.19361200 | -2.63791400 | 0.00000000  | S                                                                       | 0.11770000  | -2.69820700 | 1.30909800  |
| S                                                                                   | 2.17431600  | -1.96983400 | 0.00000000  | S                                                                       | 1.20693800  | 1.18917600  | 2.12551100  |
| S                                                                                   | 0.16599700  | -0.91092200 | -3.38009600 | S                                                                       | 1.43598100  | 2.41372400  | -1.12871100 |
| S                                                                                   | 0.16599700  | -0.91092200 | 3.38009600  | S                                                                       | 3.33212200  | -1.11977900 | -0.24766000 |
| S                                                                                   | -0.77327300 | 2.88822400  | 2.08278300  | S                                                                       | -2.29376800 | 2.51774300  | 0.37429800  |
| S                                                                                   | -0.77327300 | 2.88822400  | -2.08278300 | S                                                                       | -3.28857100 | -1.41231800 | -0.54881800 |
| <b>2D PdAl<sub>6</sub>S<sub>6</sub> (C<sub>1</sub>, <sup>1</sup>A)</b>              |             |             |             | <b>2E PdAl<sub>6</sub>S<sub>6</sub> (C<sub>s</sub>, <sup>1</sup>A')</b> |             |             |             |
| Pd                                                                                  | 0.04861600  | 0.00524400  | 0.75912000  | Pd                                                                      | 0.11113000  | -0.97125700 | 0.00000000  |
| Al                                                                                  | -1.74586700 | 1.23903600  | -0.57162600 | Al                                                                      | 2.03642500  | 0.09288700  | 1.25833800  |
| Al                                                                                  | 1.18526900  | -2.07944400 | -0.03216200 | Al                                                                      | -0.44578900 | -0.00343500 | 2.20900500  |
| Al                                                                                  | 2.48059400  | 0.24719200  | 0.23668100  | Al                                                                      | -2.16302600 | 0.44501300  | 0.00000000  |
| Al                                                                                  | -2.74840500 | -0.89444100 | 1.58343000  | Al                                                                      | -0.15522200 | 1.85543300  | 0.00000000  |
| Al                                                                                  | 0.85384200  | 2.16953100  | -0.20054400 | Al                                                                      | 2.03642500  | 0.09288700  | -1.25833800 |
| Al                                                                                  | -1.32532000 | -1.76466800 | -0.45058900 | Al                                                                      | -0.44578900 | -0.00343500 | -2.20900500 |
| S                                                                                   | 3.05543600  | 2.26875700  | -0.37449400 | S                                                                       | 1.21763500  | -1.41318300 | -2.70093500 |
| S                                                                                   | -0.76014500 | 3.02858800  | -1.39283600 | S                                                                       | -2.63601300 | -0.16722000 | 2.10009500  |
| S                                                                                   | -0.08485900 | -3.46254900 | -1.14923600 | S                                                                       | 0.90802500  | 1.96934900  | 2.02544900  |
| S                                                                                   | -2.72091500 | -0.44009400 | -1.60299100 | S                                                                       | 1.21763500  | -1.41318300 | 2.70093500  |
| S                                                                                   | 3.35175000  | -1.75923600 | 0.20237600  | S                                                                       | 0.90802500  | 1.96934900  | -2.02544900 |
| S                                                                                   | -1.92488200 | 1.22923100  | 1.67549400  | S                                                                       | -2.63601300 | -0.16722000 | -2.10009500 |
| <b>3 PtAl<sub>6</sub>S<sub>6</sub> (D<sub>6h</sub>, <sup>1</sup>A<sub>1g</sub>)</b> |             |             |             | <b>3B PtAl<sub>6</sub>S<sub>6</sub> (C<sub>s</sub>, <sup>1</sup>A')</b> |             |             |             |
| Pt                                                                                  | 0.00000000  | 0.00000000  | 0.00000000  | Pt                                                                      | 0.62517100  | 0.25529800  | 0.00000000  |
| Al                                                                                  | 0.00000000  | 2.57597200  | 0.00000000  | Al                                                                      | -1.10890500 | 1.95446800  | 0.00000000  |
| Al                                                                                  | 2.23085700  | 1.28798600  | 0.00000000  | Al                                                                      | 0.06991800  | -1.91387500 | 1.39161300  |
| Al                                                                                  | -2.23085700 | 1.28798600  | 0.00000000  | Al                                                                      | 0.06991800  | -1.91387500 | -1.39161300 |
| Al                                                                                  | -2.23085700 | -1.28798600 | 0.00000000  | Al                                                                      | 2.27563100  | 1.86022800  | 0.00000000  |
| Al                                                                                  | 0.00000000  | -2.57597200 | 0.00000000  | Al                                                                      | -0.29879400 | 0.65583400  | -2.25114100 |

|                                                                         |             |             |             |                                                                        |             |             |             |
|-------------------------------------------------------------------------|-------------|-------------|-------------|------------------------------------------------------------------------|-------------|-------------|-------------|
| Al                                                                      | 2.23085700  | -1.28798600 | 0.00000000  | Al                                                                     | -0.29879400 | 0.65583400  | 2.25114100  |
| S                                                                       | 1.99791600  | 3.46049200  | 0.00000000  | S                                                                      | -0.29879400 | -1.19024400 | -3.44999300 |
| S                                                                       | -1.99791600 | 3.46049200  | 0.00000000  | S                                                                      | -1.71777900 | 2.35936800  | -2.07068900 |
| S                                                                       | -3.99583200 | 0.00000000  | 0.00000000  | S                                                                      | -1.46252100 | -2.68288200 | 0.00000000  |
| S                                                                       | -1.99791600 | -3.46049200 | 0.00000000  | S                                                                      | -0.29879400 | -1.19024400 | 3.44999300  |
| S                                                                       | 1.99791600  | -3.46049200 | 0.00000000  | S                                                                      | 1.87191700  | -1.95506900 | 0.00000000  |
| S                                                                       | 3.99583200  | 0.00000000  | 0.00000000  | S                                                                      | -1.71777900 | 2.35936800  | 2.07068900  |
| <b>3C PtAl<sub>6</sub>S<sub>6</sub> (C<sub>1</sub>, <sup>1</sup>A)</b>  |             |             |             | <b>3D PtAl<sub>6</sub>S<sub>6</sub> (C<sub>1</sub>, <sup>1</sup>A)</b> |             |             |             |
| Pt                                                                      | 0.05247200  | -0.00061700 | -0.63331700 | Pt                                                                     | 0.03331900  | -0.67736100 | -0.48412800 |
| Al                                                                      | -1.76471900 | -1.22313000 | 0.66700400  | Al                                                                     | -2.02280500 | -1.71513400 | -1.23071300 |
| Al                                                                      | 1.19629800  | 2.06935000  | 0.13665600  | Al                                                                     | -0.16682700 | 1.69701500  | -0.99546800 |
| Al                                                                      | 2.48106600  | -0.24797600 | -0.15145300 | Al                                                                     | 2.30480300  | 0.72133100  | -0.15637200 |
| Al                                                                      | -2.72248300 | 0.90815200  | -1.54794700 | Al                                                                     | -2.20650100 | 0.47041500  | 0.49944800  |
| Al                                                                      | 0.82720600  | -2.17848300 | 0.27878800  | Al                                                                     | 1.89331300  | -1.84924600 | 0.79039500  |
| Al                                                                      | -1.34481300 | 1.74899700  | 0.53651900  | Al                                                                     | 0.26846200  | 0.05595200  | 1.81562300  |
| S                                                                       | 3.02644300  | -2.27471300 | 0.46485700  | S                                                                      | 2.44594600  | 0.42982200  | 2.10737300  |
| S                                                                       | -0.79230400 | -3.02329100 | 1.47858900  | S                                                                      | -3.76482500 | -1.00896700 | -0.17020500 |
| S                                                                       | -0.10124500 | 3.44692100  | 1.22411300  | S                                                                      | 3.05003200  | -1.17695300 | -1.00205700 |
| S                                                                       | -2.78426400 | 0.45020000  | 1.66276300  | S                                                                      | -1.62164300 | 0.54996100  | 2.68164800  |
| S                                                                       | 3.36448300  | 1.75269900  | -0.07372700 | S                                                                      | 1.81520300  | 2.58234800  | -1.22418400 |
| S                                                                       | -1.89036500 | -1.22379600 | -1.60382400 | S                                                                      | -2.14437800 | 2.42940400  | -0.61981600 |
| <b>3E PtAl<sub>6</sub>S<sub>6</sub> (C<sub>s</sub>, <sup>1</sup>A')</b> |             |             |             |                                                                        |             |             |             |
| Pt                                                                      | 0.81711800  | 0.02872600  | 0.00000000  |                                                                        |             |             |             |
| Al                                                                      | -1.99342800 | 0.15528700  | 0.00000000  |                                                                        |             |             |             |
| Al                                                                      | -0.65541600 | 0.83073000  | 2.08217400  |                                                                        |             |             |             |
| Al                                                                      | -0.20348100 | -1.82429200 | -1.39334100 |                                                                        |             |             |             |
| Al                                                                      | -0.20348100 | -1.82429200 | 1.39334100  |                                                                        |             |             |             |
| Al                                                                      | -0.65541600 | 0.83073000  | -2.08217400 |                                                                        |             |             |             |
| Al                                                                      | 0.16631900  | 2.38979900  | 0.00000000  |                                                                        |             |             |             |
| S                                                                       | -1.97181100 | -2.24538200 | 0.00000000  |                                                                        |             |             |             |
| S                                                                       | 1.45245400  | -2.48410500 | 0.00000000  |                                                                        |             |             |             |
| S                                                                       | -0.20348100 | -0.93246900 | -3.38828000 |                                                                        |             |             |             |
| S                                                                       | -0.20348100 | -0.93246900 | 3.38828000  |                                                                        |             |             |             |
| S                                                                       | -0.08844800 | 3.00052200  | 2.08384800  |                                                                        |             |             |             |
| S                                                                       | -0.08844800 | 3.00052200  | -2.08384800 |                                                                        |             |             |             |

**Table S2.** Orbital composition analysis for the canonical molecular orbitals (CMOs) of GM NiAl<sub>6</sub>S<sub>6</sub> (**1**,  $D_{6h}$ ,  $^1A_{1g}$ ) cluster. Main components greater than 15% are shown in bold.

| CMO                                                                                                         | Al <sub>6</sub> (%) |              | S <sub>6</sub> (%) |              | Ni (%)                   |              |
|-------------------------------------------------------------------------------------------------------------|---------------------|--------------|--------------------|--------------|--------------------------|--------------|
|                                                                                                             | s/p                 | total        | s/p                | total        | s/p/d                    | total        |
| 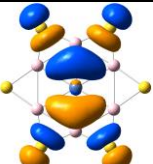<br>HOMO ( $e_{1u}$ )      | 11.64/ <b>20.38</b> | <b>32.02</b> | 0.00/ <b>43.27</b> | <b>43.27</b> | 0.00/ <b>22.85</b> /0.00 | <b>22.85</b> |
| <br>HOMO' ( $e_{1u}$ )     | 11.64/ <b>20.39</b> | <b>32.03</b> | 0.00/ <b>43.29</b> | <b>43.29</b> | 0.00/ <b>22.85</b> /0.00 | <b>22.85</b> |
| <br>HOMO-1 ( $a_{1g}$ )   | 0.00/3.89           | 3.89         | 0.00/0.00          | 0.00         | 0.00/0.00/ <b>85.47</b>  | <b>85.47</b> |
| <br>HOMO-2 ( $e_{1g}$ )  | 0.00/0.00           | 0.00         | 0.00/9.06          | 9.06         | 0.00/0.00/ <b>90.55</b>  | <b>90.55</b> |
| <br>HOMO-2' ( $e_{1g}$ ) | 0.00/0.00           | 0.00         | 0.00/9.06          | 9.06         | 0.00/0.00/ <b>90.55</b>  | <b>90.55</b> |
| <br>HOMO-3 ( $e_{2g}$ )  | 0.00/0.00           | 0.00         | 0.00/ <b>15.95</b> | <b>15.95</b> | 0.00/0.00/ <b>81.88</b>  | <b>81.88</b> |

| CMO                                                                                                               | Al <sub>6</sub> (%) |       | S <sub>6</sub> (%) |              | Ni (%)                  |              |
|-------------------------------------------------------------------------------------------------------------------|---------------------|-------|--------------------|--------------|-------------------------|--------------|
|                                                                                                                   | s/p                 | total | s/p                | total        | s/p/d                   | total        |
| 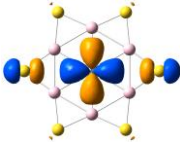<br>HOMO-3' (e <sub>2g</sub> )   | 0.00/0.00           | 0.00  | 0.00/ <b>15.87</b> | <b>15.87</b> | 0.00/0.00/ <b>81.88</b> | <b>81.88</b> |
| <br>HOMO-4 (b <sub>1g</sub> )    | 0.00/0.00           | 0.00  | 0.00/ <b>97.64</b> | <b>97.64</b> | 0.00/0.00/0.00          | 0.00         |
| <br>HOMO-5 (e <sub>2u</sub> )    | 0.00/7.87           | 7.87  | 0.00/90.33         | <b>90.33</b> | 0.00/0.00/0.00          | 0.00         |
| <br>HOMO-5' (e <sub>2u</sub> ) | 0.00/7.87           | 7.87  | 0.00/ <b>90.33</b> | <b>90.33</b> | 0.00/0.00/0.00          | 0.00         |
| <br>HOMO-6 (a <sub>2g</sub> )  | 0.00/6.05           | 6.05  | 0.00/ <b>91.37</b> | <b>91.37</b> | 0.00/0.00/0.00          | 0.00         |
| <br>HOMO-7 (a <sub>1g</sub> )  | 0.00/14.37          | 14.37 | 0.00/ <b>57.38</b> | <b>57.38</b> | 14.05/0.00/10.19        | <b>24.24</b> |

| CMO                                                                                                                | Al <sub>6</sub> (%) |              | S <sub>6</sub> (%) |              | Ni (%)         |       |
|--------------------------------------------------------------------------------------------------------------------|---------------------|--------------|--------------------|--------------|----------------|-------|
|                                                                                                                    | s/p                 | total        | s/p                | total        | s/p/d          | total |
| 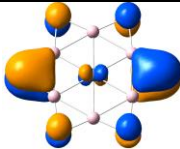<br>HOMO-8 (e <sub>1g</sub> )     | 0.00/ <b>20.54</b>  | <b>20.54</b> | 0.00/ <b>70.32</b> | <b>70.32</b> | 0.00/0.00/7.97 | 7.97  |
| <br>HOMO-8' (e <sub>1g</sub> )    | 0.00/ <b>20.54</b>  | <b>20.54</b> | 0.00/ <b>70.32</b> | <b>70.32</b> | 0.00/0.00/7.97 | 7.97  |
| <br>HOMO-9 (a <sub>2u</sub> )     | 0.00/ <b>28.41</b>  | <b>28.41</b> | 0.00/ <b>70.06</b> | <b>70.06</b> | 0.00/0.52/0.00 | 0.52  |
| <br>HOMO-10 (e <sub>1u</sub> )   | 2.17/10.10          | 12.27        | 0.00/ <b>84.28</b> | <b>84.28</b> | 0.00/0.00/0.00 | 0.00  |
| <br>HOMO-10' (e <sub>1u</sub> ) | 1.45/11.77          | 13.22        | 0.00/ <b>84.25</b> | <b>84.25</b> | 0.00/0.00/0.00 | 0.00  |
| <br>HOMO-11 (e <sub>2g</sub> )  | 1.22/ <b>16.50</b>  | <b>17.72</b> | 1.22/ <b>74.09</b> | <b>75.31</b> | 0.00/0.00/4.23 | 4.23  |

| CMO                                                                                                                | Al <sub>6</sub> (%) |       | S <sub>6</sub> (%) |       | Ni (%)         |       |
|--------------------------------------------------------------------------------------------------------------------|---------------------|-------|--------------------|-------|----------------|-------|
|                                                                                                                    | s/p                 | total | s/p                | total | s/p/d          | total |
| 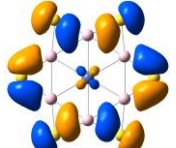<br>HOMO-11' (e <sub>2g</sub> )   | 0.00/16.49          | 16.49 | 0.00/74.09         | 74.09 | 0.00/0.00/4.23 | 4.23  |
| <br>HOMO-12 (b <sub>2u</sub> )    | 0.00/9.58           | 9.58  | 7.77/79.07         | 86.84 | 0.00/0.00/0.00 | 0.00  |
| <br>HOMO-13 (b <sub>1u</sub> )    | 19.94/7.53          | 27.47 | 0.00/68.86         | 68.86 | 0.00/0.00/0.00 | 0.00  |
| <br>HOMO-14 (e <sub>2g</sub> )   | 19.59/0.00          | 19.59 | 8.19/59.64         | 67.83 | 0.00/0.00/6.85 | 6.85  |
| <br>HOMO-14' (e <sub>2g</sub> ) | 19.59/1.81          | 21.40 | 8.18/59.63         | 67.81 | 0.00/0.00/6.85 | 6.85  |
| <br>HOMO-15 (e <sub>1u</sub> )  | 24.57/10.03         | 34.60 | 13.15/43.28        | 56.43 | 0.00/5.35/0.00 | 5.35  |



| CMO                                                                                                                | Al <sub>6</sub> (%)         |              | S <sub>6</sub> (%)  |              | Ni (%)          |       |
|--------------------------------------------------------------------------------------------------------------------|-----------------------------|--------------|---------------------|--------------|-----------------|-------|
|                                                                                                                    | s/p                         | total        | s/p                 | total        | s/p/d           | total |
| 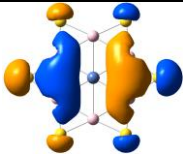<br>HOMO-15' (e <sub>1u</sub> )   | <b>24.58</b> /10.67         | <b>35.25</b> | 13.15/ <b>43.15</b> | <b>56.30</b> | 0.00/5.35/0.00  | 5.35  |
| <br>HOMO-16 (a <sub>1g</sub> )    | <b>24.50</b> / <b>24.36</b> | <b>48.86</b> | 12.13/ <b>20.96</b> | <b>33.09</b> | 11.24/0.00/3.52 | 14.76 |
| <br>HOMO-17 (b <sub>2u</sub> )    | 0.00/ <b>17.45</b>          | <b>17.45</b> | <b>80.56</b> /0.00  | <b>80.56</b> | 0.00/0.00/0.00  | 0.00  |
| <br>HOMO-18 (e <sub>2g</sub> )   | 3.06/ <b>15.55</b>          | <b>18.61</b> | <b>78.46</b> /0.00  | <b>78.46</b> | 0.00/0.00/0.00  | 0.00  |
| <br>HOMO-18' (e <sub>2g</sub> ) | 2.04/14.97                  | <b>17.01</b> | <b>77.28</b> /1.20  | <b>78.48</b> | 0.00/0.00/0.00  | 0.00  |
| <br>HOMO-19 (e <sub>1u</sub> )  | 12.14/7.78                  | <b>19.92</b> | <b>74.31</b> /1.87  | <b>76.18</b> | 0.00/0.00/0.00  | 0.00  |

| CMO                                                                                                              | Al <sub>6</sub> (%) |              | S <sub>6</sub> (%) |              | Ni (%)         |       |
|------------------------------------------------------------------------------------------------------------------|---------------------|--------------|--------------------|--------------|----------------|-------|
|                                                                                                                  | s/p                 | total        | s/p                | total        | s/p/d          | total |
| 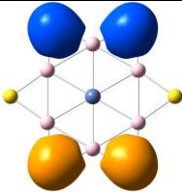<br>HOMO-19' (e <sub>1u</sub> ) | 12.14/7.78          | <b>19.92</b> | <b>75.44</b> /0.00 | <b>75.44</b> | 0.00/0.00/0.00 | 0.00  |
| <br>HOMO-20 (a <sub>1g</sub> )  | <b>19.01</b> /0.00  | <b>19.01</b> | <b>74.24</b> /1.13 | <b>75.37</b> | 0.78/0.00/0.00 | 0.78  |

**Table S3.** Orbital composition analysis for the lowest unoccupied molecular orbitals (LUMOs) of the  $\text{MAl}_6\text{S}_6$  ( $\text{M} = \text{Ni}, \text{Pd}, \text{Pt}$ ) series.

| Species                            | LUMO                                                                              | Symmetry | $\text{Al}_6$ (%) | $\text{S}_6$ (%) | $\text{M}$ (%) |
|------------------------------------|-----------------------------------------------------------------------------------|----------|-------------------|------------------|----------------|
| <b>1</b> $\text{NiAl}_6\text{S}_6$ | 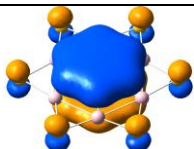 | $a_{2u}$ | 52.72             | 25.18            | 22.09          |
| <b>2</b> $\text{PdAl}_6\text{S}_6$ |  | $a_{2u}$ | 43.88             | 23.87            | 32.23          |
| <b>3</b> $\text{PtAl}_6\text{S}_6$ |  | $a_{2u}$ | 42.12             | 23.98            | 33.87          |

**Figure S1.** The AdNDP bonding pattern of PdAl<sub>6</sub>S<sub>6</sub>. Occupation numbers (ONs) are shown.

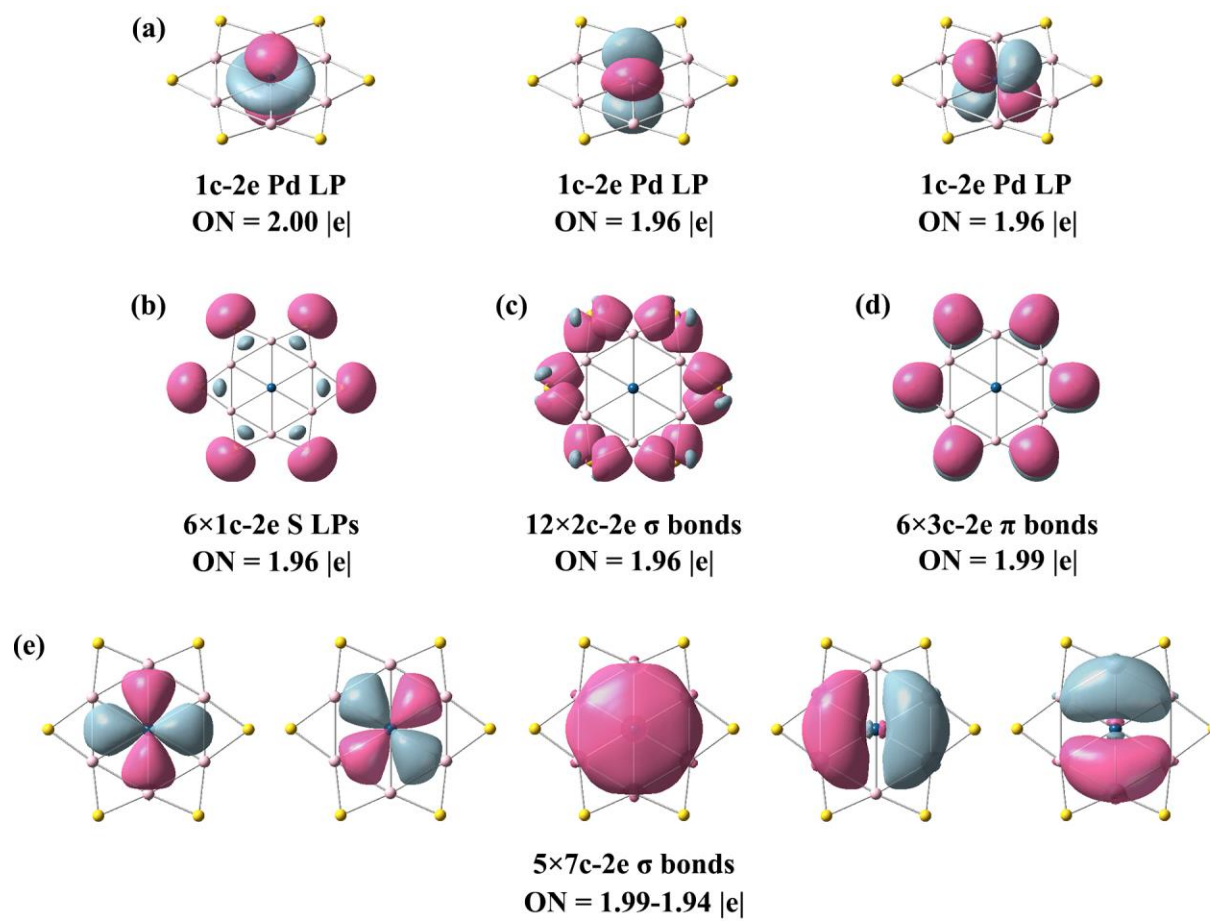

**Figure S2.** The AdNDP bonding pattern of  $\text{PtAl}_6\text{S}_6$ . Occupation numbers (ONs) are shown.

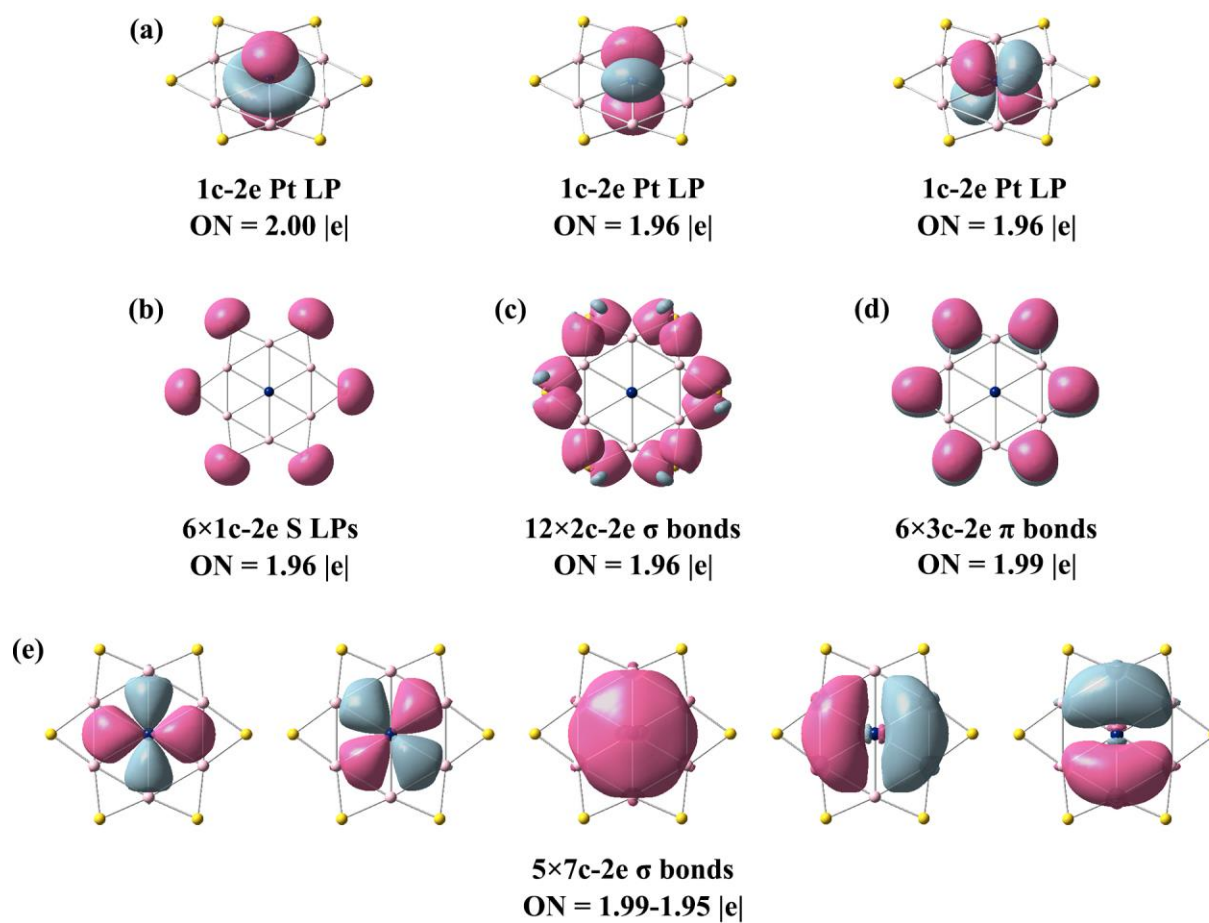

**Figure S3.** Nucleus independent chemical shifts (NICSs) for clusters **1–3**. Here the NICS(0) data (blue color) are calculated at the center of the Al-M-Al (M = Ni, Pd, Pt) triangle, whereas the NICS(1) values (red color) are at 1 Å above the center of the Al-S-Al triangle.

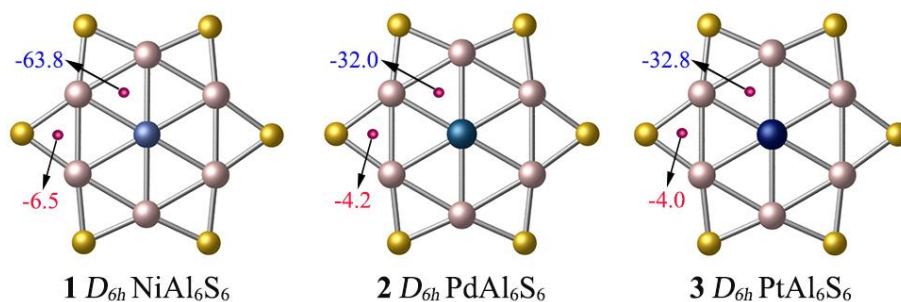

**Figure S4.** Calculated IR spectrums of PdAl<sub>6</sub>S<sub>6</sub> and PtAl<sub>6</sub>S<sub>6</sub> at the PBE0/def2-TZVP level.

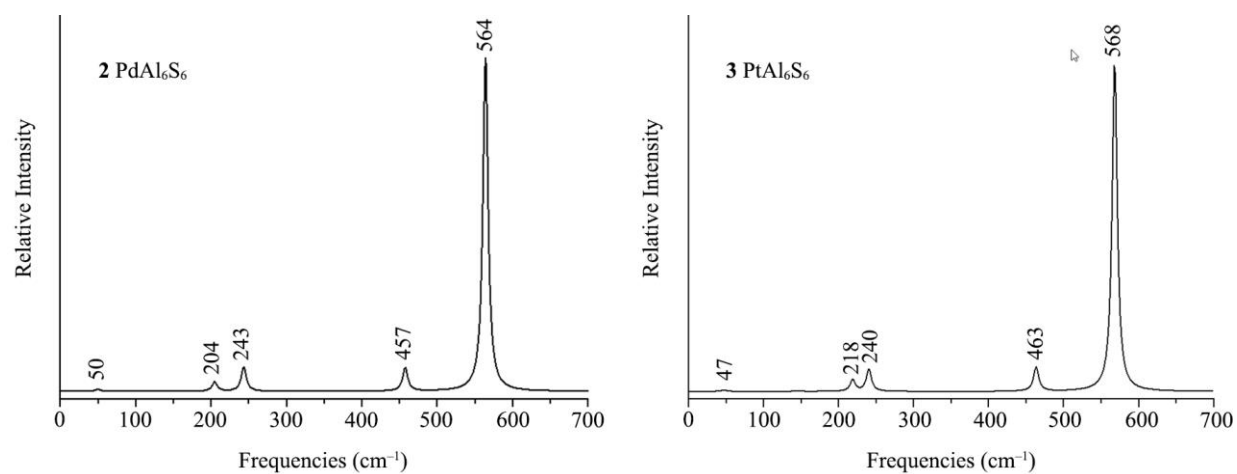

Supplement: s1 [file s1]
